# Supplementary material for: Enteric Chromosomal Islands: DNA Packaging Specificity and Role of λ-like Helper Phage Terminase
Source: MDPI journal article supplement (doi:10.3390/v14040818), 2022-04-15
Supplement: s1 [file s1]

**Table S1. PICI and Phage DNA Recognition Sites and Proteins.**

| Bacterium<br>[Accession Number]<br>Island name                         | Rpp/TerS- $\lambda$ {number or amino acids} [Accession #]<br>(Range)                                                                                                                                                                              | <i>cosQ</i> to bp300. <i>cosQ</i> and <i>cosN</i> are highlighted in yellow, the Rpp start codon in green, and the Rpp coding sequence continued in grey. For <i>cos<math>\lambda</math></i> , R3, R2 and R1 are highlighted.                                                                                                                                          |
|------------------------------------------------------------------------|---------------------------------------------------------------------------------------------------------------------------------------------------------------------------------------------------------------------------------------------------|------------------------------------------------------------------------------------------------------------------------------------------------------------------------------------------------------------------------------------------------------------------------------------------------------------------------------------------------------------------------|
| <i>E. Coli</i> CFT073<br>[AAN79974.1]<br>PICI-A                        | RppA {144} [AE014075]<br>( <i>rpp</i> Range:1388373-1388654)<br><br>MIDKACFVSQQEIAEHFKVNRTTIRAWTKQGMPYLNADR<br>GKSGGYHIGHTLLWSSGKSRLEAIRYHVETSALEKIMFA<br>RLLSERDEYSSEETEHRFDEGLQIYGYSPEDEVSKARNK<br>MAGFLAGWRHAVSVRRASMEQ SADTEQ                 | GGGTCCTTTCCGGCATATGGACCCGTTACGGGGCGGCGACCTCGCGGG<br>TTTTCGCTATTTATGACGTTTTTCCGTGAAGGTGACACCACCACCACT<br>TGATTAATATTTAACCATGCAGTTAAGGTAACATTATGATTGATAAAG<br>CTTGTTTTGTAAAGTCAGCAGGAAATAGCTGAACATTTCAAGGTAAACA<br>GAACCACTATTTCGCGCATGGACCAAACAGGGGATGCCGTATCTTAATG<br>CGGATCGCGGAAAGTCTGGCGGTTATCACATCGGGCATA CATTGCTTT<br>GGTCTTCAGGTAAGCCGTCTTGAGGCCATCAGATATCACG    |
| <i>E. coli</i> upec-187<br>[NZ_JSLW01000069.1]<br>PICI-B               | RppB {146} [WP_033562019.1]<br>( <i>rpp</i> Range: = 207846-211846)<br><br>MNNKDCFVSQQEIAEHFKVNRTTIRAWTKQGMPYLDADR<br>GKSGGYHIGHTLFWCMGKSHLDAIEYHGETSALEKIMVA<br>RLISLERDEYFSEETEQRFDNGLQIYGYSPEDEVSKARNK<br>MAGFLAGWRHAVAIRREHLQQSVVTEQEN        | GGGTCCTTTCCAGAATCAGAAACACCGCGGGGCGGCAGACGCGCAAAA<br>ACGCGCTATTTATGACGCTTTCCGGGAAAGGTACACCACCACCACTT<br>GATTAATATTTAATCGCATTATTAAGGTAACGTTATGAATAATAAGA<br>TTGTTTTGTAGTCAGCAGGAAATAGCAGAACATTTCAAGGTCAACAG<br>AACCACCTATTTCGCGCATGGACCAAACAGGGCATGCCGTATCTTGATGC<br>GGATCGCGGAAAGTCCGGCGGTTATCACATCGGACACACATTATTCTG<br>GTGCATGGGTAAAAGTCATCTTGATGCTATTGAGTACCACG       |
| <i>E. coli</i> HH29S<br>[NZ_VNXH01000006.1]<br>PICI-C                  | RppC {153} [WP_160513534.1]<br>( <i>rpp</i> Range: 193800-195500)<br><br>MSEKEFFLSQQEIIDQFGVDRTTVRAWTKRGLPFI EGDK<br>GKPGRYQLGHVLFWVRGQEGKELGMTGELHPLDCIMHS<br>REIMLSMVGEEEDKQ EYEKKFNKGLEIYGYSPEDEIAQAR<br>GRAQGI EIGRELTLKRLKKHTNENKKKRKLIRQNDT | GGGTCCTTTCCGGCGATCCGAAAGGTTACGGGGCGGCAGACGCGCAAAA<br>AAAGCGCTATTTATGACGCTTTCCGGGAAAGGTACACCACCACCACT<br>TGATTAATATTCAACCAGTAATTATTGGTAACATTATGAGTGAAAAAG<br>AATTTTTCTTAAGCCAGCAGGAAATAGCAGATCAATTTGGAGTAGACA<br>GGACAACCTGT CAGGGCATGGACTAAACGCGGTTTGCCATT CATTGAAG<br>GAGATAAAGGAAAGCCGGGCGCTACCAGTTAGGACATGTTCTTTTTTT<br>GGGTAAGAGGACAGGAAGGACTCAAAGA ACTGGGTATGACTG |
| <i>Pluralibacter gergoviae</i><br>MGH173<br>[NGRT01000001.1]<br>PICI-G | RppG {139} [OUF48096.1]<br>( <i>rpp</i> Range: 2872558..2872977)<br><br>MKGKSFFVSQQDIAEHFGVNRTTIRTWTKQGPYLEADR<br>GKPGGYHIGHVLWWSMGKRRFEEIEFQGD TSALEKIMFA<br>RLISSELDGPYGEEFERKFDESLLIYGTYLEDVSMARNK<br>MAGFRAGWSHRVAARPNGNSVT                   | GGGTCCTTTCTGGTGATCCGGCGCGTTACGGGGCGACGACCTCACAGG<br>ATTCCGCTACATATGAAATTTTCTGGGGATACCACACCACCACCACTC<br>CTTGATTAAAAATAATCAGATGGAAAAGGTAATGTAATGAAGGGTAA<br>GAGTTTTTTGTAAAGTCAGCAGGACATTGCTGAGCATTTCCGGCGTAAA<br>CAGAACCACGATCCGCACCTGGACTAAACAGGGCATGCCCTATCTGGA<br>GGCCGATCGTGGGAAGCCCGGTGGTTATCACATTGGCCACGTCTTGTG<br>GTGGAGTATGGGTAAAAGACGCTTTGAAGAAATCGAGTTTCA     |
| Phage $\lambda$<br>[NC_001416]                                         | TerS- $\lambda$ {181} [NP_040580.1]<br>( <i>Nu1</i> range: 191-736)<br><br>MEVNKKQLADIFGASIRTIQNWQEQGMPVLRGGGKGNEV<br>LYDSAAVIK WYAERDAEIE NEKL RREVEELRQASEADLQ<br>PGTIEYERHRLTRAQADAQELKNARDSAEVVETAFCTFV                                       | GGGTCCTTTCCGGTGATCCGACAGGTTACGGGGCGGCGACCTCGCGGG<br>TTTTCGCTATTTATGAAAATTTTCCGGTTTAAGGCGTTTCCGTTCTTC<br>TTCGTCATAACTTAATGTTTTTATTTAAATACCCTCTGAAAAGAAAG<br>GAAACGACAGGTGCTGAAAGCGAGGCTTTTTTGCCCTCTGTCTGTTTCT<br>TTCCTGTTTTTGTCCGTGGAATGAACAATGGAAGTCAACAAAAAGCA                                                                                                        |

|                                            |                                                                                                                                                                                                                                                                        |                                                                                                                                                                                                                                                                                                                                                                                                        |
|--------------------------------------------|------------------------------------------------------------------------------------------------------------------------------------------------------------------------------------------------------------------------------------------------------------------------|--------------------------------------------------------------------------------------------------------------------------------------------------------------------------------------------------------------------------------------------------------------------------------------------------------------------------------------------------------------------------------------------------------|
|                                            | LSRIAGEIASILDGLPLSVQRRFPELENRHVDFLKRDI I<br>KAMNKAAALDELIPGLLSEYIEQSG                                                                                                                                                                                                  | GCTGGCTGACATTTTCGGTGCGAGTATCCGTACCATT CAGAACTGGCA<br>GGAACAGGGAATGCCCGTTCTGCGAGGCGGTGGCAAGGGTAA                                                                                                                                                                                                                                                                                                        |
| Phage N15<br><a href="#">[NC_001901.1]</a> | TerS-N15 {168} <a href="#">[1261640]</a><br>( <i>l</i> range = 89-595)<br><br>MAVLLNKSDMASSLGISVQAFDKWGVQPVEKRGREVFDD<br>VRSVVDNRLLENQSRKLQSPGDDDDGVNIDYERWRLTRA<br>NADAAELANEKKRREVVEAFCTFVLSRIA AEISSILDG<br>IPLSMQRRFPELENRHIEFLKGDVIKAMNKAAALDERIP<br>GLLNDYIDQSGS | <b>GGGTCCT</b> TTCCGGCAATCCGCCCTGTTA <b>CGGGGCGGCGTCCGCG</b> CAGA<br>TTCTCGCTATATATGAAAAATTTGGACAT <b>GAGGTTGTTGTT</b> TAATCAT<br>TGCTGAAAACTGGTGAGGGAAT <b>ATG</b> GCCGTGTTATTGAATAAATCTGA<br>TATGGCTTCCTCGCTGGGAATATCCGTCCAGGCCTTTGATAAATGGGG<br>TGTCCAGCCTGTAGAGAAGAGGGGTCGTGAAGTCTTCTTTGATGTTCG<br>GTCAGTCGTAGATAACCGGCTCGAAAACCAGAGCAGAAAAC TACAACC<br>ATCTCCGGGTGACGACGATGATGGTGTCAATATTGATTATGA |
